# Supplementary material
Source: publisher site journal article supplement (https://www.dovepress.com/article/538362)
Supplement: Supplementary file 1 [file supplementary%20%20table%201_1.pdf]

Supplementary Table 1: Local Citations and Betweenness Centrality of Documents in the Co-Citation Network

| No. | Local Citations | Betweenness Centrality | year | Article                                                                                  |
|-----|-----------------|------------------------|------|------------------------------------------------------------------------------------------|
| 1   | 71              | 0.06                   | 2019 | dos Santos DP, 2019, EUR RADIOL, V29, P1640, DOI 10.1007/s00330-018-5601-1               |
| 2   | 66              | 0                      | 2023 | Kung Tiffany H, 2023, PLOS DIGIT HEALTH, V2, Pe0000198, DOI 10.1371/journal.pdig.0000198 |
| 3   | 54              | 0.02                   | 2019 | Paranjape Ketan, 2019, JMIR MED EDUC, V5, Pe16048, DOI 10.2196/16048                     |
| 4   | 52              | 0.04                   | 2020 | Sit C, 2020, INSIGHTS IMAGING, V11, P0, DOI 10.1186/s13244-019-0830-7                    |
| 5   | 46              | 0.01                   | 2023 | Gilson Aidan, 2023, JMIR MED EDUC, V9, Pe45312, DOI 10.2196/45312                        |
| 6   | 45              | 0.05                   | 2019 | Topol EJ, 2019, NAT MED, V25, P44, DOI 10.1038/s41591-018-0300-7                         |
| 7   | 36              | 0.01                   | 2021 | Lee J, 2021, ACAD MED, V96, PS62, DOI 10.1097/ACM.0000000000004291                       |
| 8   | 35              | 0.07                   | 2020 | McCoy LG, 2020, NPJ DIGIT MED, V3, P0, DOI 10.1038/s41746-020-0294-7                     |
| 9   | 35              | 0                      | 2023 | Sallam M, 2023, HEALTHCARE-BASEL, V11, P0, DOI 10.3390/healthcare11060887                |
| 10  | 35              | 0.02                   | 2024 | Lee H, 2024, ANAT SCI EDUC, V17, P926, DOI 10.1002/ase.2270                              |
| 11  | 34              | 0.03                   | 2019 | Chan Kai Siang, 2019, JMIR MED EDUC, V5, Pe13930, DOI 10.2196/13930                      |
| 12  | 32              | 0.01                   | 2023 | Khan RA, 2023, PAK J MED SCI, V39, P605, DOI 10.12669/pjms.39.2.7653                     |
| 13  | 31              | 0.02                   | 2019 | Masters K, 2019, MED TEACH, V41, P976, DOI 10.1080/0142159X.2019.1595557                 |
| 14  | 30              | 0.02                   | 2019 | Gong B, 2019, ACAD RADIOL, V26, P566, DOI 10.1016/j.acra.2018.10.007                     |
| 15  | 27              | 0.03                   | 2023 | Eysenbach Gunther, 2023, JMIR MED EDUC, V9, Pe46885, DOI 10.2196/46885                   |
| 16  | 27              | 0.01                   | 2022 | Civaner MM, 2022, BMC MED EDUC, V22, P0, DOI 10.1186/s12909-022-03852-3                  |
| 17  | 26              | 0.01                   | 2021 | Wood EA, 2021, J MED EDUC CURRIC DE, V8, P0, DOI 10.1177/23821205211024078               |
| 18  | 25              | 0.05                   | 2019 | Park SH, 2019, J EDUC EVAL HEALTH P, V16, P0, DOI 10.3352/jeehp.2019.16.18               |
| 19  | 25              | 0.01                   | 2018 | Kolachalama VB, 2018, NPJ DIGIT MED, V1, P0, DOI 10.1038/s41746-018-0061-1               |
| 20  | 25              | 0.06                   | 2019 | Wartman Steven A, 2019, AMA J ETHICS, V21, PE146, DOI 10.1001/amajethics.2019.146        |
| 21  | 24              | 0.02                   | 2023 | Abd-alrazaq A, 2023, JMIR MED EDUC, V9, P0, DOI 10.2196/48291                            |
| 22  | 23              | 0.02                   | 2018 | Wartman SA, 2018, ACAD MED, V93, P1107, DOI 10.1097/ACM.0000000000002044                 |
| 23  | 22              | 0.01                   | 2023 | OConnor S, 2023, NURSE EDUC PRACT, V66, P0, DOI 10.1016/j.nepr.2022.103537               |
| 24  | 21              | 0.03                   | 2021 | Park CJ, 2021, CURR PROBL DIAGN RAD, V50, P614, DOI 10.1067/j.cpradiol.2020.06.011       |
| 25  | 21              | 0                      | 2023 | Huh S, 2023, J EDUC EVAL HEALTH P, V20, P0, DOI 10.3352/jeehp.2023.20.1                  |
| 26  | 21              | 0.01                   | 2019 | Davenport Thomas, 2019, FUTURE HEALTHC J, V6, P94, DOI 10.7861/futurehosp.6-2-94         |
| 27  | 20              | 0.01                   | 2023 | Biswas S, 2023, RADIOLOGY, V307, P0, DOI 10.1148/radiol.223312                           |
| 28  | 20              | 0                      | 2020 | Sapci AH, 2020, JMIR MED EDUC, V6, P0, DOI 10.2196/19285                                 |
| 29  | 20              | 0.08                   | 2021 | Grunhut J, 2021, J MED EDUC CURRIC DE, V8, P0, DOI 10.1177/23821205211036836             |
| 30  | 19              | 0.01                   | 2019 | Oh S, 2019, J MED INTERNET RES, V21, P0, DOI 10.2196/12422                               |

|    |    |      |      |                                                                                     |
|----|----|------|------|-------------------------------------------------------------------------------------|
| 31 | 19 | 0    | 2021 | Karaca O, 2021, BMC MED EDUC, V21, P0, DOI 10.1186/s12909-021-02546-6               |
| 32 | 19 | 0.02 | 2023 | Arif TB, 2023, MED EDUC ONLINE, V28, P0, DOI 10.1080/10872981.2023.2181052          |
| 33 | 19 | 0    | 2023 | Alkaissi H, 2023, CUREUS J MED SCIENCE, V15, P0, DOI 10.7759/cureus.35179           |
| 34 | 18 | 0.09 | 2023 | Ayers JW, 2023, JAMA INTERN MED, V183, P589, DOI 10.1001/jamainternmed.2023.1838    |
| 35 | 17 | 0.01 | 2019 | Han ER, 2019, BMC MED EDUC, V19, P0, DOI 10.1186/s12909-019-1891-5                  |
| 36 | 17 | 0    | 2019 | Amisha, 2019, J FAM MED PRIM CARE, V8, P2328, DOI 10.4103/jfmpc.jfmpc.440.19        |
| 37 | 16 | 0.04 | 2022 | Grunhut J, 2022, JMIR MED EDUC, V8, P0, DOI 10.2196/35587                           |
| 38 | 16 | 0.02 | 2023 | Dave T, 2023, FRONT ARTIF INTELL, V6, P0, DOI 10.3389/frai.2023.1169595             |
| 39 | 16 | 0    | 2023 | Kung TH, 2023, PLOS DIGIT HEALTH, V2, P0                                            |
| 40 | 15 | 0.01 | 2023 | Lee P, 2023, NEW ENGL J MED, V388, P1233, DOI 10.1056/NEJMsr2214184                 |
| 41 | 15 | 0.02 | 2019 | Ahuja AS, 2019, PEERJ, V7, P0, DOI 10.7717/peerj.7702                               |
| 42 | 15 | 0    | 2023 | Shen YQ, 2023, RADIOLOGY, V307, P0, DOI 10.1148/radiol.230163                       |
| 43 | 15 | 0.03 | 2023 | Stokel-Walker C, 2023, NATURE, V613, P620, DOI 10.1038/d41586-023-00107-z           |
| 44 | 15 | 0.02 | 2021 | Bisdas S, 2021, FRONT PUBLIC HEALTH, V9, P0, DOI 10.3389/fpubh.2021.795284          |
| 45 | 14 | 0.05 | 2022 | Ahmed Z, 2022, ANN MED SURG, V76, P0, DOI 10.1016/j.amsu.2022.103493                |
| 46 | 14 | 0.09 | 2023 | Karabacak M, 2023, JMIR MED EDUC, V9, P0, DOI 10.2196/48163                         |
| 47 | 13 | 0.01 | 2023 | Sun GH, 2023, NURS EDUC, V48, P119, DOI 10.1097/NNE.0000000000001390                |
| 48 | 13 | 0.03 | 2023 | Kitamura FC, 2023, RADIOLOGY, V307, P0, DOI 10.1148/radiol.230171                   |
| 49 | 13 | 0.04 | 2020 | Dumic-Cule I, 2020, CROAT MED J, V61, P457, DOI 10.3325/cmj.2020.61.457             |
| 50 | 13 | 0    | 2023 | Bockting CL, 2023, NATURE, V614, P224, DOI 10.1038/d41586-023-00288-7               |
| 51 | 12 | 0.04 | 2023 | Moldt JA, 2023, MED EDUC ONLINE, V28, P0, DOI 10.1080/10872981.2023.2182659         |
| 52 | 12 | 0.01 | 2020 | Bin Dahmash Abdulmajeed, 2020, BJR OPEN, V2, P20200037, DOI 10.1259/bjro.20200037   |
| 53 | 12 | 0    | 2022 | Çaliskan SA, 2022, PLOS ONE, V17, P0, DOI 10.1371/journal.pone.0271872              |
| 54 | 12 | 0.04 | 2023 | Patel SB, 2023, LANCET DIGIT HEALTH, V5, PE107, DOI 10.1016/S2589-7500(23)00021-3   |
| 55 | 12 | 0.01 | 2021 | Katznelson G, 2021, ADV HEALTH SCI EDUC, V26, P1447, DOI 10.1007/s10459-021-10040-3 |
| 56 | 12 | 0.01 | 2018 | Hosny A, 2018, NAT REV CANCER, V18, P500, DOI 10.1038/s41568-018-0016-5             |
| 57 | 12 | 0    | 2021 | Buchanan Christine, 2021, JMIR NURS, V4, Pe23933, DOI 10.2196/23933                 |
| 58 | 11 | 0.01 | 2021 | Harish V, 2021, MEDEDPUBLISH, V10, P0, DOI 10.15694/mep.2021.000075.1               |
| 59 | 11 | 0.03 | 2023 | Masters K, 2023, MED TEACH, V45, P574, DOI 10.1080/0142159X.2023.2186203            |
| 60 | 11 | 0.02 | 2020 | Briganti G, 2020, FRONT MED-LAUSANNE, V7, P0, DOI 10.3389/fmed.2020.00027           |
| 61 | 10 | 0    | 2022 | Jha N, 2022, ADV MED EDUC PRACT, V13, P927, DOI 10.2147/AMEP.S368519                |
| 62 | 10 | 0    | 2023 | Tsang R, 2023, J MED EDUC CURRIC DE, V10, P0, DOI 10.1177/23821205231178449         |
| 63 | 10 | 0    | 2023 | Russell RG, 2023, ACAD MED, V98, P348, DOI 10.1097/ACM.0000000000004963             |

|    |    |      |      |                                                                                                |
|----|----|------|------|------------------------------------------------------------------------------------------------|
| 64 | 10 | 0.01 | 2019 | Winkler-Schwartz A, 2019, J SURG EDUC, V76, P1681, DOI 10.1016/j.jsurg.2019.05.015             |
| 65 | 10 | 0    | 2023 | Kasneci E, 2023, LEARN INDIVID DIFFER, V103, P0, DOI 10.1016/j.lindif.2023.102274              |
| 66 | 10 | 0    | 2023 | Gao CA, 2023, NPJ DIGIT MED, V6, P0, DOI 10.1038/s41746-023-00819-6                            |
| 67 | 10 | 0.01 | 2023 | Li SW, 2023, AM J OBSTET GYNECOL, V229, P0, DOI 10.1016/j.ajog.2023.04.020                     |
| 68 | 10 | 0.04 | 2017 | Esteva A, 2017, NATURE, V542, P115, DOI 10.1038/nature21056                                    |
| 69 | 10 | 0.01 | 2021 | Ooi Su Kai Gideon, 2021, SINGAPORE MED J, V62, P126, DOI 10.11622/smedj.2019141                |
| 70 | 10 | 0.01 | 2023 | Das D, 2023, CUREUS J MED SCIENCE, V15, P0, DOI 10.7759/cureus.36034                           |
| 71 | 10 | 0    | 2023 | Seetharaman R, 2023, J MED SYST, V47, P0, DOI 10.1007/s10916-023-01957-w                       |
| 72 | 9  | 0.01 | 2023 | Choi EPH, 2023, NURS EDUC TODAY, V125, P0, DOI 10.1016/j.nedt.2023.105796                      |
| 73 | 9  | 0    | 2019 | Obermeyer Z, 2019, SCIENCE, V366, P447, DOI 10.1126/science.aax2342                            |
| 74 | 9  | 0    | 2021 | Lomis Kimberly, 2021, NAM PERSPECT, V2021, P0, DOI 10.31478/202109a                            |
| 75 | 9  | 0.01 | 2023 | Takagi S, 2023, JMIR MED EDUC, V9, P0, DOI 10.2196/48002                                       |
| 76 | 9  | 0    | 2023 | Antaki F, 2023, OPHTHALMOL SCI, V3, P0, DOI 10.1016/j.xops.2023.100324                         |
| 77 | 9  | 0.01 | 2022 | Rajpurkar P, 2022, NAT MED, V28, P31, DOI 10.1038/s41591-021-01614-0                           |
| 78 | 9  | 0.01 | 2023 | Tam W, 2023, NURS EDUC TODAY, V129, P0, DOI 10.1016/j.nedt.2023.105917                         |
| 79 | 9  | 0.01 | 2022 | Fazlollahi AM, 2022, JAMA NETW OPEN, V5, P0, DOI 10.1001/jamanetworkopen.2021.49008            |
| 80 | 9  | 0.02 | 2023 | Liebrenz M, 2023, LANCET DIGIT HEALTH, V5, PE105, DOI 10.1016/S2589-7500(23)00019-5            |
| 81 | 9  | 0.01 | 2022 | Blease C, 2022, BMJ HEALTH CARE INFO, V29, P0, DOI 10.1136/bmjhci-2021-100480                  |
| 82 | 9  | 0    | 2023 | Safranek CW, 2023, JMIR MED EDUC, V9, P0, DOI 10.2023/1/e50945                                 |
| 83 | 9  | 0    | 2022 | Stokel-Walker Chris, 2022, NATURE, V0, P0, DOI 10.1038/d41586-022-04397-7                      |
| 84 | 9  | 0    | 2023 | Cooper A, 2023, NEW ENGL J MED, V389, P385, DOI 10.1056/NEJMp2304993                           |
| 85 | 8  | 0    | 2023 | Abdulai AF, 2023, NURS INQ, V30, P0, DOI 10.1111/nin.12556                                     |
| 86 | 8  | 0.01 | 2023 | Friederichs H, 2023, MED EDUC ONLINE, V28, P0, DOI 10.1080/10872981.2023.2220920               |
| 87 | 8  | 0    | 2023 | Mohammad Bushra, 2023, STUD HEALTH TECHNOL INFORM, V305, P644, DOI 10.3233/SHTI230580          |
| 88 | 8  | 0.04 | 2023 | Else H, 2023, NATURE, V613, P423, DOI 10.1038/d41586-023-00056-7                               |
| 89 | 8  | 0.02 | 2020 | Brandes Gabriela Irene Garcia, 2020, RADIOL BRAS, V53, P167, DOI 10.1590/0100-3984.2019.0101   |
| 90 | 8  | 0.01 | 2023 | Unknown -, 2023, NATURE, V613, P612, DOI 10.1038/d41586-023-00191-1                            |
| 91 | 8  | 0.01 | 2023 | Humar P, 2023, AESTHET SURG J, V43, PNP1085, DOI 10.1093/asj/sjad130                           |
| 92 | 8  | 0    | 2023 | Mir Mohammad Muzaffar, 2023, J ADV MED EDUC PROF, V11, P133, DOI 10.30476/JAMP.2023.98655.1803 |
| 93 | 8  | 0.01 | 2020 | Mirchi N, 2020, PLOS ONE, V15, P0, DOI 10.1371/journal.pone.0229596                            |
| 94 | 8  | 0    | 2023 | Busch F, 2023, MED SCI EDUC, V33, P1007, DOI 10.1007/s40670-023-01815-x                        |
| 95 | 8  | 0    | 2023 | Archibald MM, 2023, J ADV NURS, V79, P3648, DOI 10.1111/jan.15643                              |
| 96 | 8  | 0    | 2023 | Thirunavukarasu AJ, 2023, NAT MED, V29, P1930, DOI 10.1038/s41591-023-02448-8                  |

|     |   |      |      |                                                                                                   |
|-----|---|------|------|---------------------------------------------------------------------------------------------------|
| 97  | 8 | 0    | 2023 | De Angelis L, 2023, FRONT PUBLIC HEALTH, V11, P0, DOI 10.3389/fpubh.2023.1166120                  |
| 98  | 8 | 0    | 2022 | Boillat T, 2022, JMIR MED EDUC, V8, P0, DOI 10.2196/34973                                         |
| 99  | 8 | 0.01 | 2021 | van der Niet AG, 2021, MED EDUC, V55, P30, DOI 10.1111/medu.14131                                 |
| 100 | 8 | 0    | 2023 | Lecler A, 2023, DIAGN INTERV IMAG, V104, P269, DOI 10.1016/j.diii.2023.02.003                     |
| 101 | 8 | 0    | 2020 | Imran N, 2020, PAK J MED SCI, V36, P857, DOI 10.12669/pjms.36.5.3042                              |
| 102 | 8 | 0    | 2023 | Feng SW, 2023, ACAD MED, V98, P867, DOI 10.1097/ACM.0000000000005242                              |
| 103 | 7 | 0.05 | 2022 | Liu DS, 2022, JMIR MED EDUC, V8, P0, DOI 10.2196/38325                                            |
| 104 | 7 | 0    | 2024 | Han ZY, 2024, MED TEACH, V46, P657, DOI 10.1080/0142159X.2023.2271159                             |
| 105 | 7 | 0    | 2022 | Teng M, 2022, JMIR MED EDUC, V8, P0, DOI 10.2196/33390                                            |
| 106 | 7 | 0    | 2023 | Heng JJY, 2023, POSTGRAD MED J, V99, P1125, DOI 10.1093/postmj/qgad058                            |
| 107 | 7 | 0.01 | 2019 | Brouillette M, 2019, NAT MED, V25, P1808, DOI 10.1038/s41591-019-0648-3                           |
| 108 | 7 | 0.03 | 2016 | Obermeyer Z, 2016, NEW ENGL J MED, V375, P1216, DOI 10.1056/NEJMp1606181                          |
| 109 | 7 | 0    | 2023 | Singhal K, 2023, NATURE, V620, P172, DOI 10.1038/s41586-023-06291-2                               |
| 110 | 7 | 0    | 2023 | Clusmann J, 2023, COMMUN MED-LONDON, V3, P0, DOI 10.1038/s43856-023-00370-1                       |
| 111 | 7 | 0    | 2019 | Rajkomar A, 2019, NEW ENGL J MED, V380, P1347, DOI 10.1056/NEJMr1814259                           |
| 112 | 7 | 0    | 2023 | Thorp HH, 2023, SCIENCE, V379, P313, DOI 10.1126/science.adg7879                                  |
| 113 | 7 | 0    | 2023 | Dwivedi YK, 2023, INT J INFORM MANAGE, V71, P0, DOI 10.1016/j.ijinfomgt.2023.102642               |
| 114 | 7 | 0    | 2018 | Raissi M, 2018, ARXIV, V0, P0                                                                     |
| 115 | 6 | 0    | 2023 | Wang CY, 2023, J MED INTERNET RES, V25, P0, DOI 10.2196/48009                                     |
| 116 | 6 | 0.01 | 2023 | Cheung BHH, 2023, PLOS ONE, V18, P0, DOI 10.1371/journal.pone.0290691                             |
| 117 | 6 | 0    | 2022 | Reeder K, 2022, CLIN IMAG, V81, P67, DOI 10.1016/j.clinimag.2021.09.018                           |
| 118 | 6 | 0.01 | 2023 | Rudolph J, 2023, JOURNAL OF APPLIED LEARNING AND TEACHING, V6, P342, DOI 10.37074/jalt.2023.6.1.9 |
| 119 | 6 | 0.01 | 2022 | Pucchio A, 2022, BMC MED EDUC, V22, P0, DOI 10.1186/s12909-022-03896-5                            |
| 120 | 6 | 0    | 2019 | Zawacki-Richter O, 2019, INT J EDUC TECHNOL H, V16, P0, DOI 10.1186/s41239-019-0171-0             |
| 121 | 6 | 0    | 2023 | De Gagne Jennie C, 2023, INT J ENVIRON RES PUBLIC HEALTH, V20, P0, DOI 10.3390/ijerph20064884     |
| 122 | 6 | 0    | 2023 | Lo CK, 2023, EDUC SCI, V13, P0, DOI 10.3390/educsci13040410                                       |
| 123 | 6 | 0.01 | 2022 | Doumat G, 2022, FRONT ARTIF INTELL, V5, P0, DOI 10.3389/frai.2022.1015418                         |
| 124 | 6 | 0.02 | 2023 | Tlili A, 2023, SMART LEARN ENVIRON, V10, P0, DOI 10.1186/s40561-023-00237-x                       |
| 125 | 6 | 0.02 | 2019 | Blease C, 2019, J MED INTERNET RES, V21, P0, DOI 10.2196/12802                                    |
| 126 | 6 | 0.01 | 2023 | Liu JL, 2023, NURS OUTLOOK, V71, P0, DOI 10.1016/j.outlook.2023.102064                            |
| 127 | 6 | 0.01 | 2023 | Masters K, 2023, MED TEACH, V45, P673, DOI 10.1080/0142159X.2023.2208731                          |
| 128 | 6 | 0.01 | 2019 | Sarwar S, 2019, NPJ DIGIT MED, V2, P0, DOI 10.1038/s41746-019-0106-0                              |
| 129 | 6 | 0    | 2021 | Banerjee M, 2021, BMC MED EDUC, V21, P0, DOI 10.1186/s12909-021-02870-x                           |

|     |   |      |      |                                                                                                         |
|-----|---|------|------|---------------------------------------------------------------------------------------------------------|
| 130 | 6 | 0    | 2023 | Sedaghat S, 2023, CLIN MED, V23, P278, DOI 10.7861/clinmed.2023-0078                                    |
| 131 | 6 | 0.03 | 2023 | Buabbas AJ, 2023, HEALTHCARE-BASEL, V11, P0, DOI 10.3390/healthcare11091298                             |
| 132 | 6 | 0.01 | 2024 | Boscardin CK, 2024, ACAD MED, V99, P22, DOI 10.1097/ACM.0000000000005439                                |
| 133 | 6 | 0    | 2023 | Webb Jeremy J, 2023, CUREUS, V15, Pe38755, DOI 10.7759/cureus.38755                                     |
| 134 | 6 | 0    | 2022 | Swed S, 2022, FRONT ARTIF INTELL, V5, P0, DOI 10.3389/frai.2022.1011524                                 |
| 135 | 6 | 0    | 2023 | Irwin P, 2023, NURS EDUC TODAY, V127, P0, DOI 10.1016/j.nedt.2023.105835                                |
| 136 | 6 | 0    | 2023 | Miao Hongyu, 2023, ASIAN PAC ISL NURS J, V7, Pe48136, DOI 10.2196/48136                                 |
| 137 | 6 | 0    | 2023 | Syed W, 2023, MEDICINA-LITHUANIA, V59, P0, DOI 10.3390/medicina59050828                                 |
| 138 | 6 | 0    | 2023 | Stokel-Walker C, 2023, NATURE, V614, P214, DOI 10.1038/d41586-023-00340-6                               |
| 139 | 6 | 0.01 | 2020 | Gerke S, 2020, ARTIFICIAL INTELLIGENCE IN HEALTHCARE, V0, PP295, DOI 10.1016/B978-0-12-818438-7.00012-5 |
| 140 | 6 | 0    | 2023 | Mbakwe Amarachi B, 2023, PLOS DIGIT HEALTH, V2, Pe0000205, DOI 10.1371/journal.pdig.0000205             |
| 141 | 5 | 0    | 2021 | Cho SI, 2021, J EUR ACAD DERMATOL, V35, PE72, DOI 10.1111/jdv.16812                                     |
| 142 | 5 | 0    | 2022 | Galán GC, 2022, RADIOLOGIA-MADRID, V64, P516, DOI 10.1016/j.rx.2021.03.006                              |
| 143 | 5 | 0    | 2023 | Haug CJ, 2023, NEW ENGL J MED, V388, P1201, DOI 10.1056/NEJMr2302038                                    |
| 144 | 5 | 0    | 2023 | Krive J, 2023, JAMIA OPEN, V6, P0, DOI 10.1093/jamiaopen/ooad037                                        |
| 145 | 5 | 0    | 2023 | Sallam M, 2023, HEALTHCARE, V0, P0, DOI 10.1101/2023.02.19.23286155                                     |
| 146 | 5 | 0    | 2023 | Scherr R, 2023, JMIR MED EDUC, V9, P0, DOI 10.2196/49877                                                |
| 147 | 5 | 0    | 2023 | Hirosawa Takanobu, 2023, INT J ENVIRON RES PUBLIC HEALTH, V20, P0, DOI 10.3390/ijerph20043378           |
| 148 | 5 | 0.02 | 2021 | Huisman M, 2021, EUR RADIOL, V31, P7058, DOI 10.1007/s00330-021-07781-5                                 |
| 149 | 5 | 0    | 2023 | Stewart J, 2023, PLOS ONE, V18, P0, DOI 10.1371/journal.pone.0290642                                    |
| 150 | 5 | 0.01 | 2022 | Ejaz H, 2022, DIGIT HEALTH, V8, P0, DOI 10.1177/20552076221089099                                       |
| 151 | 5 | 0    | 2023 | Vitorino LM, 2023, J CLIN NURS, V32, P7921, DOI 10.1111/jocn.16706                                      |
| 152 | 5 | 0    | 2023 | Sharma M, 2023, NURS EDUC TODAY, V131, P0, DOI 10.1016/j.nedt.2023.105972                               |
| 153 | 5 | 0.01 | 2023 | Ng FYC, 2023, CELL REP MED, V4, P0, DOI 10.1016/j.xcrm.2023.101230                                      |
| 154 | 5 | 0    | 2019 | Saima Abid Saima Abid, 2019, PAKISTAN JOURNAL OF PUBLIC HEALTH, V9, P19, DOI 10.32413/pjph.v9i1.295     |
| 155 | 5 | 0    | 2023 | Jeyaraman Madhan, 2023, CUREUS, V15, Pe44316, DOI 10.7759/cureus.44316                                  |
| 156 | 5 | 0    | 2023 | Castonguay A, 2023, NURS EDUC TODAY, V129, P0, DOI 10.1016/j.nedt.2023.105916                           |
| 157 | 5 | 0    | 2018 | Yu KH, 2018, NAT BIOMED ENG, V2, P719, DOI 10.1038/s41551-018-0305-z                                    |
| 158 | 5 | 0.01 | 2023 | Ray PP, 2023, INTERNET OF THINGS AND CYBER-PHYSICAL SYSTEMS, V3, P121, DOI 10.1016/j.iotcps.2023.04.003 |
| 159 | 5 | 0    | 2023 | Scerri A, 2023, J CLIN NURS, V32, P4211, DOI 10.1111/jocn.16677                                         |
| 160 | 5 | 0    | 2022 | Hu R, 2022, COMMUN MED-LONDON, V2, P0, DOI 10.1038/s43856-022-00125-4                                   |
| 161 | 5 | 0    | 2022 | Gao CA, 2022, BIORXIV, V0, P0, DOI 10.1101/2022.12.23.521610                                            |
| 162 | 4 | 0    | 2023 | Dergaa I, 2023, BIOL SPORT, V40, P615, DOI 10.5114/biol sport.2023.125623                               |

|     |   |      |      |                                                                                           |
|-----|---|------|------|-------------------------------------------------------------------------------------------|
| 163 | 4 | 0    | 2023 | Achiam OJ, 2023, ARXIV, V0, P0                                                            |
| 164 | 4 | 0    | 2023 | Park J, 2023, J EDUC EVAL HEALTH P, V20, P0, DOI 10.3352/jeehp.2023.20.29                 |
| 165 | 4 | 0    | 2023 | Ariyaratne S, 2023, SKELETAL RADIOL, V52, P1755, DOI 10.1007/s00256-023-04340-5           |
| 166 | 4 | 0    | 2021 | Wang WM, 2021, BMC MED EDUC, V21, P0, DOI 10.1186/s12909-021-02875-6                      |
| 167 | 4 | 0    | 2019 | Duong MT, 2019, BRIT J RADIOL, V92, P0, DOI 10.1259/bjr.20190389                          |
| 168 | 4 | 0    | 2022 | Gilson A, 2022, MEDRXIV, V0, P0                                                           |
| 169 | 4 | 0    | 2020 | Cheng CT, 2020, INSIGHTS IMAGING, V11, P0, DOI 10.1186/s13244-020-00932-0                 |
| 170 | 4 | 0    | 2022 | McLennan Stuart, 2022, PLOS DIGIT HEALTH, V1, Pe0000114, DOI 10.1371/journal.pdig.0000114 |
| 171 | 4 | 0    | 2020 | Mann B, 2020, ADV NEURAL INF PROCESS SYST, V33, P1877, DOI 10.48550/ARXIV.2005.14165      |
| 172 | 4 | 0    | 2023 | Bhayana R, 2023, RADIOLOGY, V307, P0, DOI 10.1148/radiol.230582                           |
| 173 | 4 | 0    | 2023 | Pupic Nikola, 2023, PLOS DIGIT HEALTH, V2, Pe0000255, DOI 10.1371/journal.pdig.0000255    |
| 174 | 4 | 0    | 2024 | Berse S, 2024, ANN BIOMED ENG, V52, P130, DOI 10.1007/s10439-023-03296-w                  |
| 175 | 4 | 0    | 2019 | van Hoek J, 2019, EUR J RADIOL, V121, P0, DOI 10.1016/j.ejrad.2019.108742                 |
| 176 | 4 | 0    | 2023 | Liu JL, 2023, J MED INTERNET RES, V25, P0, DOI 10.2196/48568                              |
| 177 | 4 | 0    | 2024 | Sahu PK, 2024, POSTGRAD MED J, V100, P50, DOI 10.1093/postmj/qgad090                      |
| 178 | 4 | 0    | 2023 | Temsah O, 2023, CUREUS J MED SCIENCE, V15, P0, DOI 10.7759/cureus.37281                   |
| 179 | 4 | 0    | 2023 | Tolsgaard MG, 2023, MED TEACH, V45, P565, DOI 10.1080/0142159X.2023.2180340               |
| 180 | 4 | 0    | 2023 | Kleebayoon A, 2023, CELL MOL BIOENG, V16, P173, DOI 10.1007/s12195-023-00759-x            |
| 181 | 4 | 0    | 2021 | Ronquillo CE, 2021, J ADV NURS, V77, P3707, DOI 10.1111/jan.14855                         |
| 182 | 4 | 0    | 2022 | Kansal R, 2022, CUREUS J MED SCIENCE, V14, P0, DOI 10.7759/cureus.21434                   |
| 183 | 4 | 0    | 2021 | Lindqwister AL, 2021, ACAD RADIOL, V28, P1810, DOI 10.1016/j.acra.2020.09.017             |
| 184 | 4 | 0    | 2023 | Ali Rohaid, 2023, NEUROSURGERY, V93, P1090, DOI 10.1227/neu.0000000000002551              |
| 185 | 4 | 0    | 2020 | Chen LJ, 2020, IEEE ACCESS, V8, P75264, DOI 10.1109/ACCESS.2020.2988510                   |
| 186 | 4 | 0.02 | 2023 | Mesko B, 2023, J MED INTERNET RES, V25, P0, DOI 10.2196/48392                             |
| 187 | 4 | 0.01 | 2017 | Chen Julie, 2017, KOREAN J MED EDUC, V29, P193                                            |
| 188 | 4 | 0    | 2020 | Meskó B, 2020, NPJ DIGIT MED, V3, P0, DOI 10.1038/s41746-020-00333-z                      |
| 189 | 4 | 0    | 2019 | Waymel Q, 2019, DIAGN INTERV IMAG, V100, P327, DOI 10.1016/j.diii.2019.03.015             |
| 190 | 4 | 0.01 | 2023 | Thakur A, 2023, TEACH LEARN NURS, V18, P450, DOI 10.1016/j.teln.2023.03.011               |
| 191 | 4 | 0    | 2023 | Baigi SFM, 2023, HEALTH SCI REP-US, V6, P0, DOI 10.1002/hsr2.1138                         |
| 192 | 4 | 0    | 2022 | Aboalshamat K, 2022, INT J PHARM RES ALLI, V11, P52, DOI 10.51847/NU8y6Y6q1M              |
| 193 | 4 | 0    | 2023 | Currie G, 2023, RADIOGRAPHY, V29, P792, DOI 10.1016/j.radi.2023.05.011                    |
| 194 | 4 | 0    | 2023 | Preiksaitis C, 2023, JMIR MED EDUC, V9, P0, DOI 10.2196/48785                             |
| 195 | 4 | 0    | 2023 | Sallam Malik, 2023, NARRA J, V3, Pe103, DOI 10.52225/narra.v3i1.103                       |

|     |   |      |      |                                                                                                       |
|-----|---|------|------|-------------------------------------------------------------------------------------------------------|
| 196 | 4 | 0.01 | 2022 | Fischetti C, 2022, ACAD RADIOL, V29, P570, DOI 10.1016/j.acra.2021.03.023                             |
| 197 | 4 | 0.02 | 2021 | Li YS, 2021, MED SCI EDUC, V31, P1729, DOI 10.1007/s40670-021-01405-9                                 |
| 198 | 4 | 0    | 2023 | Li QY, 2023, BMC MED EDUC, V23, P0, DOI 10.1186/s12909-023-04700-8                                    |
| 199 | 4 | 0.01 | 2023 | Roos J, 2023, JMIR MED EDUC, V9, P0, DOI 10.2196/46482                                                |
| 200 | 4 | 0.01 | 2023 | Gunawan J, 2023, BELITUNG NURS J, V9, P1, DOI 10.33546/bnj.2551                                       |
| 201 | 4 | 0    | 2023 | Fijaako N, 2023, RESUSCITATION, V185, P0, DOI 10.1016/j.resuscitation.2023.109732                     |
| 202 | 4 | 0.01 | 2018 | Rajpurkar P, 2018, PLOS MED, V15, P0, DOI 10.1371/journal.pmed.1002686                                |
| 203 | 4 | 0    | 2023 | Jowsey T, 2023, TRENDS MOL MED, V29, P971, DOI 10.1016/j.molmed.2023.08.012                           |
| 204 | 4 | 0    | 2023 | King MR, 2023, CELL MOL BIOENG, V16, P1, DOI 10.1007/s12195-022-00754-8                               |
| 205 | 4 | 0    | 2020 | Bohr A, 2020, ARTIFICIAL INTELLIGENCE IN HEALTHCARE, V0, PP25, DOI 10.1016/B978-0-12-818438-7.00002-2 |
| 206 | 4 | 0    | 2023 | Azer SA, 2023, BMC MED EDUC, V23, P0, DOI 10.1186/s12909-023-04660-z                                  |
| 207 | 4 | 0    | 2023 | Koga S, 2023, ANN BIOMED ENG, V51, P2123, DOI 10.1007/s10439-023-03253-7                              |
| 208 | 4 | 0    | 2023 | Sallam M, 2023, CUREUS J MED SCIENCE, V15, P0, DOI 10.7759/cureus.35029                               |
| 209 | 4 | 0    | 2023 | Rahsepar AA, 2023, RADIOLOGY, V307, P0, DOI 10.1148/radiol.230922                                     |
| 210 | 4 | 0.01 | 2022 | Singhal K, 2022, ARXIV, V0, P0, DOI 10.48550/arXiv.2212.13138                                         |
| 211 | 4 | 0    | 2022 | Gillissen A, 2022, HEALTHCARE-BASEL, V10, P0, DOI 10.3390/healthcare10040723                          |
| 212 | 4 | 0    | 2024 | Breeding T, 2024, AM SURGEON, V90, P560, DOI 10.1177/00031348231180950                                |
| 213 | 4 | 0    | 2023 | Nori H, 2023, ARXIV, V0, P0                                                                           |
| 214 | 4 | 0    | 2023 | Dorr DA, 2023, JAMA-J AM MED ASSOC, V329, P1347, DOI 10.1001/jama.2023.2771                           |
| 215 | 4 | 0    | 2022 | Gao CA, 2022, BIORXIV, V0, P0                                                                         |
| 216 | 4 | 0    | 2022 | OpenAI, 2022, INTRODUCING CHATGPT, V0, P0                                                             |
| 217 | 4 | 0.01 | 2023 | Sinha RK, 2023, CUREUS J MED SCIENCE, V15, P0, DOI 10.7759/cureus.35237                               |
| 218 | 4 | 0    | 2022 | ChatGPT Generative Pre-trained Transformer, 2022, ONCOSCIENCE, V9, P82, DOI 10.18632/oncoscience.571  |
| 219 | 4 | 0    | 2020 | Brown TB, 2020, ARXIV, V0, P0                                                                         |
| 220 | 4 | 0    | 2020 | Kaul V, 2020, GASTROINTEST ENDOSC, V92, P807, DOI 10.1016/j.gie.2020.06.040                           |
| 221 | 4 | 0    | 2019 | Haenlein M, 2019, CALIF MANAGE REV, V61, P5, DOI 10.1177/0008125619864925                             |
| 222 | 4 | 0.01 | 2023 | Meyer JG, 2023, BIODATA MIN, V16, P0, DOI 10.1186/s13040-023-00339-9                                  |
| 223 | 3 | 0    | 2019 | He JX, 2019, NAT MED, V25, P30, DOI 10.1038/s41591-018-0307-0                                         |
| 224 | 3 | 0    | 2019 | Palanica A, 2019, J MED INTERNET RES, V21, P0, DOI 10.2196/12887                                      |
| 225 | 3 | 0.01 | 2023 | Deng J, 2023, FRONT COMPUT INTELL SYST, V2, P81, DOI 10.54097/FCIS.V2I2.4465                          |
| 226 | 3 | 0    | 2018 | Gianfrancesco MA, 2018, JAMA INTERN MED, V178, P1544, DOI 10.1001/jamainternmed.2018.3763             |
| 227 | 3 | 0    | 2020 | Castagno S, 2020, FRONT ARTIF INTELL, V3, P0, DOI 10.3389/frai.2020.578983                            |
| 228 | 3 | 0    | 2017 | Lakhani P, 2017, RADIOLOGY, V284, P574, DOI 10.1148/radiol.2017162326                                 |

|     |   |      |      |                                                                                      |
|-----|---|------|------|--------------------------------------------------------------------------------------|
| 229 | 3 | 0    | 2021 | Yüzbasioğlu E, 2021, J DENT EDUC, V85, P60, DOI 10.1002/jdd.12385                    |
| 230 | 3 | 0    | 2023 | Bubeck S, 2023, ARXIV, V0, P0                                                        |
| 231 | 3 | 0    | 2021 | Charow R, 2021, JMIR MED EDUC, V7, P0, DOI 10.2196/31043                             |
| 232 | 3 | 0    | 2021 | James CA, 2021, ACAD MED, V96, P954, DOI 10.1097/ACM.0000000000003943                |
| 233 | 3 | 0    | 2018 | Krittanawong C, 2018, EUR J INTERN MED, V48, PE13, DOI 10.1016/j.ejim.2017.06.017    |
| 234 | 3 | 0    | 2020 | Carin L, 2020, ACAD MED, V95, PS10, DOI 10.1097/ACM.0000000000003630                 |
| 235 | 3 | 0    | 2023 | Guo BY, 2023, ARXIV, V0, P0                                                          |
| 236 | 3 | 0    | 2019 | Gallix B, 2019, EUR RADIOL, V29, P1637, DOI 10.1007/s00330-018-5995-9                |
| 237 | 3 | 0    | 2023 | King MR, 2023, ANN BIOMED ENG, V51, P291, DOI 10.1007/s10439-022-03121-w             |
| 238 | 3 | 0.01 | 2015 | Bayne S, 2015, TEACH HIGH EDUC, V20, P455, DOI 10.1080/13562517.2015.1020783         |
| 239 | 3 | 0    | 2022 | OpenAI, 2022, INTR CHATGPT, V0, P0                                                   |
| 240 | 3 | 0    | 2022 | Nagy M, 2022, MED SCI EDUC, V32, P529, DOI 10.1007/s40670-022-01502-3                |
| 241 | 3 | 0    | 2018 | Wahl B, 2018, BMJ GLOB HEALTH, V3, P0, DOI 10.1136/bmjgh-2018-000798                 |
| 242 | 3 | 0    | 2023 | Ghosh A, 2023, CUREUS J MED SCIENCE, V15, P0, DOI 10.7759/cureus.37023               |
| 243 | 3 | 0    | 2023 | Rao ARY, 2023, MEDRXIV, V0, P0, DOI 10.1101/2023.02.21.23285886                      |
| 244 | 3 | 0.01 | 2020 | Panayides AS, 2020, IEEE J BIOMED HEALTH, V24, P1837, DOI 10.1109/JBHI.2020.2991043  |
| 245 | 3 | 0    | 2023 | Ahn Sangzin, 2023, KOREAN J MED EDUC, V35, P103, DOI 10.3946/kjme.2023.253           |
| 246 | 3 | 0    | 2019 | Kelly CJ, 2019, BMC MED, V17, P0, DOI 10.1186/s12916-019-1426-2                      |
| 247 | 3 | 0    | 2023 | Kim SG, 2023, MAX PLAST RECONSTR S, V45, P0, DOI 10.1186/s40902-023-00381-x          |
| 248 | 3 | 0    | 2023 | Flores-Cohaila JA, 2023, JMIR MED EDUC, V9, P0, DOI 10.2196/48039                    |
| 249 | 3 | 0    | 2020 | Rampton V, 2020, LANCET DIGIT HEALTH, V2, PE111, DOI 10.1016/S2589-7500(20)30023-6   |
| 250 | 3 | 0    | 2019 | Mintz Y, 2019, MINIM INVASIV THER, V28, P73, DOI 10.1080/13645706.2019.1575882       |
| 251 | 3 | 0    | 2021 | Korteling JE, 2021, FRONT ARTIF INTELL, V4, P0, DOI 10.3389/frai.2021.622364         |
| 252 | 3 | 0    | 2024 | Cotton DRE, 2024, INNOV EDUC TEACH INT, V61, P228, DOI 10.1080/14703297.2023.2190148 |
| 253 | 3 | 0    | 2020 | Blease C, 2020, DIGIT HEALTH, V6, P0, DOI 10.1177/2055207620968355                   |
| 254 | 3 | 0.01 | 2020 | Abdullah R, 2020, J MED INTERNET RES, V22, P0, DOI 10.2196/17620                     |
| 255 | 3 | 0.05 | 2023 | Cascella M, 2023, J MED SYST, V47, P0, DOI 10.1007/s10916-023-01925-4                |
| 256 | 3 | 0    | 2022 | Kung TH, 2022, MEDRXIV, V0, P0, DOI 10.1101/2022.12.19.22283643                      |
| 257 | 3 | 0.04 | 2023 | Kuhail MA, 2023, EDUC INF TECHNOL, V28, P973, DOI 10.1007/s10639-022-11177-3         |
| 258 | 3 | 0    | 2021 | Pucchio A, 2021, NAT BIOTECHNOL, V39, P388, DOI 10.1038/s41587-021-00846-2           |
| 259 | 3 | 0    | 2023 | OpenAI, 2023, GPT-4 TECHNICAL REPORT, V0, P0                                         |
| 260 | 3 | 0    | 2023 | Khairatun Hisan U, 2023, J PEDAGOGY EDUC SCI, V2, P71, DOI 10.56741/JPES.V2I01.302   |
| 261 | 3 | 0    | 2023 | Morreel S, 2023, MED TEACH, V45, P665, DOI 10.1080/0142159X.2023.2187684             |

|     |   |      |      |                                                                                           |
|-----|---|------|------|-------------------------------------------------------------------------------------------|
| 262 | 3 | 0    | 2023 | Benoit JRA, 2023, MEDRXIV, V0, P0, DOI 10.1101/2023.02.04.23285478                        |
| 263 | 3 | 0.01 | 2022 | Jeblick K, 2022, ARXIV, V0, P0                                                            |
| 264 | 3 | 0    | 2023 | Grünebaum A, 2023, AM J OBSTET GYNECOL, V228, P696, DOI 10.1016/j.ajog.2023.03.009        |
| 265 | 3 | 0.02 | 2023 | Anders BA, 2023, C2C DIGITAL MAGAZINE, V1, P4                                             |
| 266 | 3 | 0    | 2020 | McKinney SM, 2020, NATURE, V577, P89, DOI 10.1038/s41586-019-1799-6                       |
| 267 | 3 | 0.01 | 2018 | Alonso-Silverio GA, 2018, SURG INNOV, V25, P380, DOI 10.1177/1553350618777045             |
| 268 | 3 | 0    | 2021 | Hedderich DM, 2021, HEALTHCARE-BASEL, V9, P0, DOI 10.3390/healthcare9101278               |
| 269 | 2 | 0    | 2017 | Recht M, 2017, J AM COLL RADIOL, V14, P1476, DOI 10.1016/j.jacr.2017.07.007               |
| 270 | 2 | 0    | 2019 | Law M, 2019, ACAD MED, V94, P353, DOI 10.1097/ACM.0000000000002521                        |
| 271 | 2 | 0    | 2019 | Robert Nancy, 2019, NURS MANAGE, V50, P30, DOI 10.1097/01.NUMA.0000578988.56622.21        |
| 272 | 2 | 0    | 2021 | Scheetz J, 2021, SCI REP-UK, V11, P0, DOI 10.1038/s41598-021-84698-5                      |
| 273 | 2 | 0.01 | 2019 | Kelly M, 2019, MED EDUC, V53, P967, DOI 10.1111/medu.13916                                |
| 274 | 2 | 0    | 2016 | Latifi S, 2016, EVAL HEALTH PROF, V39, P100, DOI 10.1177/0163278715605358                 |
| 275 | 2 | 0    | 2020 | Pinnock R, 2020, MED TEACH, V42, P246, DOI 10.1080/0142159X.2019.1679361                  |
| 276 | 2 | 0    | 2017 | Chen JH, 2017, NEW ENGL J MED, V376, P2507, DOI 10.1056/NEJMp1702071                      |
| 277 | 2 | 0    | 2019 | Duan YQ, 2019, INT J INFORM MANAGE, V48, P63, DOI 10.1016/j.ijinfomgt.2019.01.021         |
| 278 | 2 | 0    | 2018 | Choy G, 2018, RADIOLOGY, V288, P318, DOI 10.1148/radiol.2018171820                        |
| 279 | 2 | 0    | 2019 | Rigby MJ, 2019, AMA J. ETHICS, V21, P121, DOI 10.1001/AMAJETHICS.2019.121                 |
| 280 | 2 | 0    | 2019 | Noguerol TM, 2019, J AM COLL RADIOL, V16, P1239, DOI 10.1016/j.jacr.2019.05.047           |
| 281 | 2 | 0    | 2017 | Jiang F, 2017, STROKE VASC NEUROL, V2, P230, DOI 10.1136/svn-2017-000101                  |
| 282 | 2 | 0.01 | 2018 | Beregi JP, 2018, DIAGN INTERV IMAG, V99, P727, DOI 10.1016/j.diii.2018.10.003             |
| 283 | 2 | 0    | 2019 | Liu XX, 2019, LANCET DIGIT HEALTH, V1, PE271, DOI 10.1016/S2589-7500(19)30123-2           |
| 284 | 2 | 0.01 | 2015 | LeCun Y, 2015, NATURE, V521, P436, DOI 10.1038/nature14539                                |
| 285 | 2 | 0.01 | 2017 | Chartrand G, 2017, RADIOGRAPHICS, V37, P2113, DOI 10.1148/rg.2017170077                   |
| 286 | 2 | 0    | 2022 | Santomartino SM, 2022, ACAD RADIOL, V29, P1748, DOI 10.1016/j.acra.2021.12.032            |
| 287 | 2 | 0    | 2021 | Huisman M, 2021, EUR RADIOL, V31, P8797, DOI 10.1007/s00330-021-07782-4                   |
| 288 | 2 | 0    | 2018 | Hessler G, 2018, MOLECULES, V23, P0, DOI 10.3390/molecules23102520                        |
| 289 | 2 | 0    | 2021 | Grainger R, 2021, MED EDUC, V55, P23, DOI 10.1111/medu.14261                              |
| 290 | 2 | 0    | 2017 | Vedula SS, 2017, ANNU REV BIOMED ENG, V19, P301, DOI 10.1146/annurev-bioeng-071516-044435 |
| 291 | 2 | 0.02 | 2018 | Betancur J, 2018, JACC-CARDIOVASC IMAG, V11, P1654, DOI 10.1016/j.jcmg.2018.01.020        |
| 292 | 2 | 0.01 | 2018 | Johnston SC, 2018, ACAD MED, V93, P1105, DOI 10.1097/ACM.0000000000002175                 |
| 293 | 2 | 0    | 2020 | Doraiswamy PM, 2020, ARTIF INTELL MED, V102, P0, DOI 10.1016/j.artmed.2019.101753         |
| 294 | 2 | 0    | 2019 | Noorbakhsh-Sabet N, 2019, AM J MED, V132, P795, DOI 10.1016/j.amjmed.2019.01.017          |

|     |   |      |      |                                                                                                    |
|-----|---|------|------|----------------------------------------------------------------------------------------------------|
| 295 | 2 | 0.01 | 2017 | Kohli M, 2017, AM J ROENTGENOL, V208, P754, DOI 10.2214/AJR.16.17224                               |
| 296 | 2 | 0    | 2019 | Mazurowski MA, 2019, J AM COLL RADIOL, V16, P1077, DOI 10.1016/j.jacr.2019.01.026                  |
| 297 | 2 | 0    | 2018 | Pesapane Filippo, 2018, EUR RADIOL EXP, V2, P35, DOI 10.1186/s41747-018-0061-6                     |
| 298 | 2 | 0    | 2018 | Beam AL, 2018, JAMA-J AM MED ASSOC, V319, P1317, DOI 10.1001/jama.2017.18391                       |
| 299 | 2 | 0.03 | 2016 | Beam AL, 2016, JAMA-J AM MED ASSOC, V316, P2368, DOI 10.1001/jama.2016.17217                       |
| 300 | 2 | 0    | 2017 | Prevedello LM, 2017, RADIOLOGY, V285, P923, DOI 10.1148/radiol.2017162664                          |
| 301 | 2 | 0    | 2019 | Grayev A, 2019, ACAD RADIOL, V26, P699, DOI 10.1016/j.acra.2019.01.005                             |
| 302 | 2 | 0    | 2018 | Price WN, 2018, SCI TRANSL MED, V10, P0, DOI 10.1126/scitranslmed.aao5333                          |
| 303 | 2 | 0    | 2020 | Simpson SA, 2020, J AM COLL RADIOL, V17, P1388, DOI 10.1016/j.jacr.2020.09.028                     |
| 304 | 2 | 0.01 | 2018 | Buch VH, 2018, BRIT J GEN PRACT, V68, P143, DOI 10.3399/bjgp18X695213                              |
| 305 | 2 | 0    | 2019 | Paszke A, 2019, ADV NEUR IN, V32, P0                                                               |
| 306 | 2 | 0    | 2020 | Benjamens S, 2020, NPJ DIGIT MED, V3, P0, DOI 10.1038/s41746-020-00324-0                           |
| 307 | 2 | 0.01 | 2021 | Coppola F, 2021, RADIOL MED, V126, P63, DOI 10.1007/s11547-020-01205-y                             |
| 308 | 2 | 0    | 2019 | McGrow Kathleen, 2019, NURSING, V49, P46, DOI 10.1097/01.NURSE.0000577716.57052.8d                 |
| 309 | 2 | 0    | 2016 | de Bruijne M, 2016, MED IMAGE ANAL, V33, P94, DOI 10.1016/j.media.2016.06.032                      |
| 310 | 2 | 0    | 2019 | Ting DSW, 2019, BRIT J OPHTHALMOL, V103, P167, DOI 10.1136/bjophthalmol-2018-313173                |
| 311 | 2 | 0    | 2018 | Blease C, 2018, PLOS ONE, V13, P0, DOI 10.1371/journal.pone.0207418                                |
| 312 | 2 | 0    | 2020 | Park Y, 2020, JAMIA OPEN, V3, P326, DOI 10.1093/jamiaopen/ooaa033                                  |
| 313 | 2 | 0    | 2019 | Paranjape K, 2019, JMIR MED EDUC, V5, P0                                                           |
| 314 | 2 | 0    | 2018 | Bartlett JD, 2018, BONE JOINT J, V100B, P559, DOI 10.1302/0301-620X.100B5.BJJ-2017-1439            |
| 315 | 2 | 0    | 2019 | Langlotz CP, 2019, RADIOL-ARTIF INTELL, V1, P0, DOI 10.1148/ryai.2019190058                        |
| 316 | 2 | 0    | 2017 | Hamet P, 2017, METABOLISM, V69, PS36, DOI 10.1016/j.metabol.2017.01.011                            |
| 317 | 2 | 0    | 2019 | Wartman SA, 2019, ACAD MED, V94, P1412, DOI 10.1097/ACM.0000000000002866                           |
| 318 | 2 | 0    | 2019 | Brkljacic B, 2019, INSIGHTS IMAGING, V10, P0, DOI 10.1186/s13244-019-0798-3                        |
| 319 | 2 | 0    | 2017 | Popenici Stefan A D, 2017, RES PRACT TECHNOL ENHANC LEARN, V12, P22, DOI 10.1186/s41039-017-0062-8 |
| 320 | 2 | 0    | 2020 | Laï MC, 2020, J TRANSL MED, V18, P0, DOI 10.1186/s12967-019-02204-y                                |
| 321 | 2 | 0.01 | 2018 | Liew C, 2018, EUR J RADIOL, V102, P152, DOI 10.1016/j.ejrad.2018.03.019                            |
| 322 | 2 | 0    | 2018 | Mayo RC, 2018, CLIN IMAG, V49, P87, DOI 10.1016/j.clinimag.2017.11.007                             |
| 323 | 2 | 0    | 2018 | Tajmir SH, 2018, ACAD RADIOL, V25, P747, DOI 10.1016/j.acra.2018.03.007                            |
| 324 | 2 | 0    | 2020 | Jindal A, 2020, MEDEDPUBLISH, V9, P200                                                             |
| 325 | 2 | 0    | 2018 | Collado-Mesa F, 2018, J AM COLL RADIOL, V15, P1753, DOI 10.1016/j.jacr.2017.12.021                 |
| 326 | 2 | 0    | 2020 | Machleid F, 2020, J MED INTERNET RES, V22, P0, DOI 10.2196/19827                                   |
| 327 | 2 | 0    | 2019 | Esteva A, 2019, NAT MED, V25, P24, DOI 10.1038/s41591-018-0316-z                                   |

|     |   |      |      |                                                                                    |
|-----|---|------|------|------------------------------------------------------------------------------------|
| 328 | 2 | 0    | 2019 | Li D, 2019, ACAD MED, V94, P623, DOI 10.1097/ACM.0000000000002661                  |
| 329 | 2 | 0    | 2018 | Syeda-Mahmood T, 2018, J AM COLL RADIOL, V15, P569, DOI 10.1016/j.jacr.2018.01.028 |
| 330 | 2 | 0    | 2020 | Nagendran M, 2020, BMJ-BRIT MED J, V368, P0, DOI 10.1136/bmj.m689                  |
| 331 | 2 | 0.01 | 2018 | Tang A, 2018, CAN ASSOC RADIOL J, V69, P120, DOI 10.1016/j.carj.2018.02.002        |
| 332 | 2 | 0    | 2019 | Price WN, 2019, JAMA-J AM MED ASSOC, V322, P1765, DOI 10.1001/jama.2019.15064      |
| 333 | 2 | 0    | 2018 | Chilamkurthy S, 2018, LANCET, V392, P2388, DOI 10.1016/S0140-6736(18)31645-3       |
| 334 | 2 | 0    | 2017 | Erickson BJ, 2017, J DIGIT IMAGING, V30, P400, DOI 10.1007/s10278-017-9965-6       |
| 335 | 2 | 0    | 2019 | Parikh RB, 2019, JAMA-J AM MED ASSOC, V322, P2377, DOI 10.1001/jama.2019.18058     |
| 336 | 2 | 0    | 2020 | Eltorai AEM, 2020, J THORAC IMAG, V35, P255, DOI 10.1097/RTI.0000000000000453      |
| 337 | 2 | 0    | 2019 | Haenssle H A, 2019, ANN ONCOL, V30, P130e, DOI 10.1093/annonc/mdy520               |
| 338 | 2 | 0    | 2018 | Hashimoto DA, 2018, ANN SURG, V268, P70, DOI 10.1097/SLA.0000000000002693          |
| 339 | 2 | 0    | 2018 | Carlos RC, 2018, J AM COLL RADIOL, V15, P497, DOI 10.1016/j.jacr.2018.01.029       |
| 340 | 2 | 0.01 | 2017 | Pols J, 2017, NURS PHILOS, V18, P0, DOI 10.1111/nup.12154                          |
| 341 | 2 | 0    | 2020 | Du-Harpur X, 2020, BRIT J DERMATOL, V183, P423, DOI 10.1111/bjd.18880              |
| 342 | 2 | 0.02 | 2019 | Ardila D, 2019, NAT MED, V25, P954, DOI 10.1038/s41591-019-0447-x                  |
| 343 | 1 | 0    | 2010 | Unknown -, 2010, COMP INT COMPLEX DEC, V0, P0                                      |
| 344 | 1 | 0    | 2018 | Alagappan M, 2018, WORLD J GASTRO ENDOS, V10, P239, DOI 10.4253/wjge.v10.i10.239   |
| 345 | 1 | 0    | 2019 | Arcadu F, 2019, NPJ DIGIT MED, V2, P0, DOI 10.1038/s41746-019-0172-3               |
| 346 | 1 | 0    | 1993 | JELOVSEK FR, 1993, M D COMPUT, V10, P165                                           |
| 347 | 1 | 0    | 1997 | Wasson B, 1997, COMPUT HUM BEHAV, V13, P571, DOI 10.1016/S0747-5632(97)00027-7     |
| 348 | 1 | 0    | 2006 | Hosseini HG, 2006, MED ENG PHYS, V28, P372, DOI 10.1016/j.medengphy.2005.06.006    |
| 349 | 1 | 0    | 1996 | Lowe HJ, 1996, J AM MED INFORM ASSN, V3, P1, DOI 10.1136/jamia.1996.96342645       |
| 350 | 1 | 0    | 2017 | Elze MC, 2017, J AM COLL CARDIOL, V69, P345, DOI 10.1016/j.jacc.2016.10.060        |
| 351 | 1 | 0    | 2008 | Färber M, 2008, STUD HEALTH TECHNOL, V132, P112                                    |
| 352 | 1 | 0    | 2008 | Dokur Z, 2008, EXPERT SYST APPL, V34, P611, DOI 10.1016/j.eswa.2006.09.017         |
| 353 | 1 | 0    | 2011 | Othman AA, 2011, IFIP ADV INF COMM TE, V363, P260                                  |
| 354 | 1 | 0    | 1996 | AZEVEDO R, 1996, 26 INT C PSYCH MONTR, V0, P0                                      |
| 355 | 1 | 0    | 2016 | Garout M, 2016, INT J MED EDUC, V7, P261, DOI 10.5116/ijme.5780.bdba               |
| 356 | 1 | 0    | 1995 | BARNETT GO, 1995, J AM MED INFORM ASSN, V2, P285, DOI 10.1136/jamia.1995.96073830  |
| 357 | 1 | 0    | 1996 | PATEL VL, 1996, AMIA ANN FALL S 26 3, V0, P0                                       |
| 358 | 1 | 0    | 2016 | Beck EH, 2016, 2016 ANN M ASS AC HL, V0, P0                                        |
| 359 | 1 | 0    | 2017 | Atiiga PA, 2017, CLIN RADIOL, V72, P0, DOI 10.1016/j.crad.2017.04.012              |
| 360 | 1 | 0    | 1996 | Eliot C R, 1996, PROC AMIA ANNU FALL SYMP, V0, P7                                  |

|     |   |      |      |                                                                                                                  |
|-----|---|------|------|------------------------------------------------------------------------------------------------------------------|
| 361 | 1 | 0    | 1984 | Buchanan BG, 1984, RULE-BASED EXPERT SYSTEMS: THEMycin EXPERIMENTS OF THE STANFORD HEURISTIC PROGRAMMING PROJECT |
| 362 | 1 | 0    | 2007 | Kurnaz MN, 2007, COMPUT METH PROG BIO, V85, P187, DOI 10.1016/j.cmpb.2006.10.010                                 |
| 363 | 1 | 0    | 1996 | Friedman CP, 1996, J AM MED INFORM ASSN, V3, P184, DOI 10.1136/jamia.1996.96236286                               |
| 364 | 1 | 0    | 1994 | FRIEDMAN CP, 1994, ACAD MED, V69, P455, DOI 10.1097/00001888-199406000-00005                                     |
| 365 | 1 | 0    | 1993 | Beach LR, 1993, DECISION MAKING ACTI, V0, P0                                                                     |
| 366 | 1 | 0    | 2013 | Hall J, 2013, ESSENTIALS CLIN EXAM, V0, P640                                                                     |
| 367 | 1 | 0    | 2019 | ( FDA) FaDA, 2019, PROP REG FRAM MOD AR, V0, P0                                                                  |
| 368 | 1 | 0    | 2016 | Boysen PG, 2016, OCHSNER J, V16, P101                                                                            |
| 369 | 1 | 0    | 2014 | Goossen W, 2014, J AM MED INFORM ASSN, V21, PE363, DOI 10.1136/amia.jnl-2013-002264                              |
| 370 | 1 | 0    | 2014 | Koloverou E, 2014, METABOLISM, V63, P903, DOI 10.1016/j.metabol.2014.04.010                                      |
| 371 | 1 | 0    | 1994 | RADICE B, 1994, J NY STATE NURSES AS, V251, P14                                                                  |
| 372 | 1 | 0    | 2008 | Sharma N, 2008, APPL BAM TYPE ARTIFI, V33, P119                                                                  |
| 373 | 1 | 0    | 1996 | Glenn J, 1996, ACAD MED, V71, P251, DOI 10.1097/00001888-199603000-00014                                         |
| 374 | 1 | 0    | 1993 | DUNN PM, 1993, J GEN INTERN MED, V8, P126, DOI 10.1007/BF02599755                                                |
| 375 | 1 | 0    | 2018 | FDA, 2018, FDA PERM MARK ART IN, V0, P0                                                                          |
| 376 | 1 | 0    | 2019 | Bera K, 2019, NAT REV CLIN ONCOL, V16, P703, DOI 10.1038/s41571-019-0252-y                                       |
| 377 | 1 | 0    | 1994 | DEDOMBAL FT, 1994, METHOD INFORM MED, V33, P161                                                                  |
| 378 | 1 | 0    | 2010 | Doering S, 2010, PSYCHISCHE FUNKTIONE, V0, P0                                                                    |
| 379 | 1 | 0    | 2017 | Cabitza F, 2017, JAMA-J AM MED ASSOC, V318, P517, DOI 10.1001/jama.2017.7797                                     |
| 380 | 1 | 0    | 2015 | Monlezun DJ, 2015, ADV PREV MED, V2015, P1, DOI 10.1155/2015/656780                                              |
| 381 | 1 | 0    | 2007 | Nakib A, 2007, SIGNAL PROCESS, V87, P2516, DOI 10.1016/j.sigpro.2007.04.001                                      |
| 382 | 1 | 0.01 | 1996 | *UMUAI, 1996, INT J US MOD US AD I, V5, P0                                                                       |
| 383 | 1 | 0    | 2013 | Papish A, 2013, BMC MED EDUC, V13, P0, DOI 10.1186/1472-6920-13-141                                              |
| 384 | 1 | 0.01 | 1996 | ALEXE C, 1996, P INTELLIGENT TUTORI, V0, P439                                                                    |
| 385 | 1 | 0    | 2019 | Benenson R, 2019, PROC CVPR IEEE, V0, PP11692, DOI 10.1109/CVPR.2019.01197                                       |
| 386 | 1 | 0    | 2010 | Clerc M, 2010, PARTICLE SWARM OPTIMIZATION, V93, P0, DOI 10.1007/978-0-387-30164-8, 630                          |
| 387 | 1 | 0    | 1990 | ELSTEIN AS, 1990, EVAL HEALTH PROF, V13, P5, DOI 10.1177/016327879001300102                                      |
| 388 | 1 | 0    | 2017 | Bernardo A, 2017, WORLD NEUROSURG, V106, P1015, DOI 10.1016/j.wneu.2017.06.140                                   |
| 389 | 1 | 0    | 2017 | Mattioli AV, 2017, J CARDIOVASC MED, V18, P925, DOI 10.2459/JCM.0000000000000573                                 |
| 390 | 1 | 0    | 1996 | Chastonay P, 1996, MED EDUC, V30, P235                                                                           |
| 391 | 1 | 0    | 1990 | Kwak A R, 1990, J BIOCOMMUN, V17, P9                                                                             |
| 392 | 1 | 0    | 1994 | OXMAN AD, 1994, CAN MED ASSOC J, V150, P1793                                                                     |
| 393 | 1 | 0    | 2015 | Azarnoush H, 2015, INT J COMPUT ASS RAD, V10, P603, DOI 10.1007/s11548-014-1091-z                                |

|     |   |   |      |                                                                                                                                              |
|-----|---|---|------|----------------------------------------------------------------------------------------------------------------------------------------------|
| 394 | 1 | 0 | 1995 | NICHOLS P, 1995, EVALUATION AVIONICS, V0, P0                                                                                                 |
| 395 | 1 | 0 | 2017 | Bajunaid K, 2017, J NEUROSURG, V126, P71, DOI 10.3171/2015.5.JNS15558                                                                        |
| 396 | 1 | 0 | 2008 | Hammouche K, 2008, COMPUT VIS IMAGE UND, V109, P163, DOI 10.1016/j.cviu.2007.09.001                                                          |
| 397 | 1 | 0 | 1991 | STEVENS RH, 1991, ACAD MED, V66, PS73, DOI 10.1097/00001888-199109000-00046                                                                  |
| 398 | 1 | 0 | 2015 | Alotaibi FE, 2015, SURG INNOV, V22, P636, DOI 10.1177/1553350615579729                                                                       |
| 399 | 1 | 0 | 1985 | Hagamen WD, 1985, SECOND CONFERENCE ON ARTIFICIAL INTELLIGENCE APPLICATIONS: THE ENGINEERING OF KNOWLEDGE-BASED SYSTEMS (CAT. NO.85CH2215-2) |
| 400 | 1 | 0 | 1990 | MULSANT BH, 1990, M D COMPUT, V7, P25                                                                                                        |
| 401 | 1 | 0 | 2009 | Solis Jorge, 2009, 2009 IEEE INTERNATIONAL CONFERENCE ON ROBOTICS AND AUTOMATION (ICRA), V0, PP4219, DOI 10.1109/ROBOT.2009.5152314          |
| 402 | 1 | 0 | 1994 | CORN M, 1994, ACAD MED, V69, P958, DOI 10.1097/00001888-199412000-00005                                                                      |
| 403 | 1 | 0 | 2010 | Fu JC, 2010, COMPUT MED IMAG GRAP, V34, P308, DOI 10.1016/j.compmedimag.2009.12.002                                                          |
| 404 | 1 | 0 | 1985 | MCDONALD DD, 1985, P NCC85 CHICAGO, V54, P105                                                                                                |
| 405 | 1 | 0 | 1997 | LAJOIE SP, 1997, ANN M AERA CHIC MARC, V0, P0                                                                                                |
| 406 | 1 | 0 | 2009 | Nakib A, 2009, ENG APPL ARTIF INTEL, V22, P236, DOI 10.1016/j.engappai.2008.07.005                                                           |
| 407 | 1 | 0 | 2018 | Collins A, 2018, KNOWING, V0, P0                                                                                                             |
| 408 | 1 | 0 | 1996 | WOOLF B, 1996, WORKSH ADV IT SUPP E, V0, P0                                                                                                  |
| 409 | 1 | 0 | 2015 | Belfi LM, 2015, ACAD RADIOL, V22, P794, DOI 10.1016/j.acra.2014.11.003                                                                       |
| 410 | 1 | 0 | 1990 | SCHMIDT HG, 1990, ACAD MED, V65, P611, DOI 10.1097/00001888-199010000-00001                                                                  |
| 411 | 1 | 0 | 1997 | KEARSLEY G, 1997, EXPLORATIONS LEARNIN, V0, P0                                                                                               |
| 412 | 1 | 0 | 2008 | Mazurowski MA, 2008, NEURAL NETWORKS, V21, P427, DOI 10.1016/j.neunet.2007.12.031                                                            |
| 413 | 1 | 0 | 1991 | GRUPPEN LD, 1991, MED DECIS MAKING, V11, P233, DOI 10.1177/0272989X9101100401                                                                |
| 414 | 1 | 0 | 2017 | Brink JA, 2017, EUR RADIOL, V27, P3647, DOI 10.1007/s00330-016-4688-5                                                                        |
| 415 | 1 | 0 | 2015 | Patel R, 2015, MED TEACH, V37, P211, DOI 10.3109/0142159X.2014.975195                                                                        |
| 416 | 1 | 0 | 1996 | Kulikowski CA, 1996, J AM MED INFORM ASSN, V3, P432, DOI 10.1136/jamia.1996.97084517                                                         |
| 417 | 1 | 0 | 2007 | Yu JB, 2007, NEURAL PROCESS LETT, V26, P217, DOI 10.1007/s11063-007-9053-x                                                                   |
| 418 | 1 | 0 | 1990 | MELNICK DE, 1990, EVAL HEALTH PROF, V13, P105                                                                                                |
| 419 | 1 | 0 | 2014 | Venot A, 2014, MED INFORM E HLTH FU, V0, P0                                                                                                  |
| 420 | 1 | 0 | 2018 | Bzdok Danilo, 2018, NAT METHODS, V15, P233, DOI 10.1038/nmeth.4642                                                                           |
| 421 | 1 | 0 | 2015 | Assis-Hassid S, 2015, ISR J HEALTH POLICY, V4, P0, DOI 10.1186/2045-4015-4-4                                                                 |
| 422 | 1 | 0 | 1989 | Evans D, 1989, COGNITIVE SCIENCE IN MEDICINE: BIOMEDICAL MODELING, V0, P0                                                                    |
| 423 | 1 | 0 | 1997 | AZEVEDO R, 1997, P AI ED AIED 97 WASH, V0, P386                                                                                              |
| 424 | 1 | 0 | 2020 | Abdelal AE, 2020, INT J COMPUT ASS RAD, V15, P1369, DOI 10.1007/s11548-020-02176-1                                                           |
| 425 | 1 | 0 | 1996 | NKAMBOU R, 1996, P 3 INT C INT TUT SY, V0, P420                                                                                              |
| 426 | 1 | 0 | 2016 | Darcy AM, 2016, JAMA-J AM MED ASSOC, V315, P551, DOI 10.1001/jama.2015.18421                                                                 |

|     |   |   |      |                                                                                              |
|-----|---|---|------|----------------------------------------------------------------------------------------------|
| 427 | 1 | 0 | 2014 | Beheshti Z, 2014, SOFT COMPUT, V18, P2253, DOI 10.1007/s00500-013-1198-0                     |
| 428 | 1 | 0 | 2019 | AMA (American Medical Association), 2019, AMA AD POL INT AUGM, V0, P0                        |
| 429 | 1 | 0 | 1996 | ELIOT CR, 1996, THESIS U MASSACHUSET, V0, P0                                                 |
| 430 | 1 | 0 | 2017 | Badyal Dinesh K, 2017, INT J APPL BASIC MED RES, V7, PS1, DOI 10.4103/ijabmr.IJABMR, 385, 17 |
| 431 | 1 | 0 | 2019 | Annarumma M, 2019, RADIOLOGY, V291, P195, DOI 10.1148/radiol.2018180921                      |
| 432 | 1 | 0 | 2006 | Meissner M, 2006, BMC BIOINFORMATICS, V7, P0, DOI 10.1186/1471-2105-7-125                    |
| 433 | 1 | 0 | 2018 | Arbabshirani MR, 2018, NPJ DIGIT MED, V1, P0, DOI 10.1038/s41746-017-0015-z                  |
| 434 | 1 | 0 | 1993 | Fisher P, 1993, CAN OPER ROOM NURS J, V11, P5                                                |
| 435 | 1 | 0 | 2016 | Abràmoff MD, 2016, INVEST OPHTH VIS SCI, V57, P5200, DOI 10.1167/iovs.16-19964               |
| 436 | 1 | 0 | 1993 | HEATHFIELD HA, 1993, METHOD INFORM MED, V32, P1                                              |
| 437 | 1 | 0 | 2016 | Huedo-Medina TB, 2016, AM J CLIN NUTR, V103, P841, DOI 10.3945/ajcn.115.112771               |
| 438 | 1 | 0 | 2019 | *MICR, 2019, PROJ HAN, V0, P0                                                                |
| 439 | 1 | 0 | 2013 | Gagnier JJ, 2013, DTSCH ARZTEBL INT, V110, P603, DOI 10.3238/arztebl.2013.0603               |
| 440 | 1 | 0 | 2008 | Wang ST, 2008, PATTERN RECOGN, V41, P117, DOI 10.1016/j.patcog.2007.03.029                   |
| 441 | 1 | 0 | 2016 | Aboab J, 2016, SCI TRANSL MED, V8, P0, DOI 10.1126/scitranslmed.aad9072                      |
| 442 | 1 | 0 | 2019 | *WEST INS, 2019, WESTM INS PUTT YOU H, V0, P0                                                |
| 443 | 1 | 0 | 1984 | WINOGRAD T, 1984, SCI AM, V251, P131                                                         |
| 444 | 1 | 0 | 1993 | KLEIN GA, 1993, 9301 SOAR CSERIAC WR, V0, P0                                                 |
| 445 | 1 | 0 | 1991 | STEVENS RH, 1991, MD COMP, V0, P13                                                           |
| 446 | 1 | 0 | 1996 | Slotnick HB, 1996, ACAD MED, V71, P28, DOI 10.1097/00001888-199601000-00014                  |
| 447 | 1 | 0 | 1996 | Coiera EW, 1996, J AM MED INFORM ASSN, V3, P363, DOI 10.1136/jamia.1996.97084510             |
| 448 | 1 | 0 | 2012 | Dos Santos Machado L, 2012, J. INTERACT. SYST, V3, P9                                        |
| 449 | 1 | 0 | 2018 | Acuna D, 2018, PROC CVPR IEEE, V0, PP859, DOI 10.1109/CVPR.2018.00096                        |
| 450 | 1 | 0 | 2017 | Aarts S, 2017, J MED RADIAT SCI, V64, P3, DOI 10.1002/jmrs.207                               |
| 451 | 1 | 0 | 2010 | Frenk J, 2010, LANCET, V376, P1923, DOI 10.1016/S0140-6736(10)61854-5                        |
| 452 | 1 | 0 | 1993 | Orasanu J, 1993, DECISION MAKING ACTI, V0, P3                                                |
| 453 | 1 | 0 | 2013 | Lehmann KS, 2013, INT J COLORECTAL DIS, V28, P563, DOI 10.1007/s00384-012-1589-1             |
| 454 | 1 | 0 | 2014 | Lewis KO, 2014, BMC MED EDUC, V14, P0, DOI 10.1186/1472-6920-14-190                          |
| 455 | 1 | 0 | 2012 | Moraes RM, 2012, KNOWL-BASED SYST, V32, P3, DOI 10.1016/j.knosys.2011.09.010                 |
| 456 | 1 | 0 | 2009 | Lee J, 2009, MED ENG PHYS, V31, P1049, DOI 10.1016/j.medengphy.2009.07.001                   |
| 457 | 1 | 0 | 1985 | HAGAMEN WD, 1985, P NCC85 CHICAGO, V54, P111                                                 |
| 458 | 1 | 0 | 2018 | AMA (American Medical Association), 2018, REP COUNC LONG RANG, V0, P0                        |
| 459 | 1 | 0 | 1994 | ALFREDSON BB, 1994, J ADV NURS, V20, P964, DOI 10.1046/j.1365-2648.1994.20050964.x           |

|     |   |   |      |                                                                                  |
|-----|---|---|------|----------------------------------------------------------------------------------|
| 460 | 1 | 0 | 2018 | Abràmoff MD, 2018, NPJ DIGIT MED, V1, P0, DOI 10.1038/s41746-018-0040-6          |
| 461 | 1 | 0 | 1993 | SHORTLIFFE EH, 1993, ARTIF INTELL MED, V5, P93, DOI 10.1016/0933-3657(93)90011-Q |
| 462 | 1 | 0 | 2009 | Iscan Z, 2009, DIGIT SIGNAL PROCESS, V19, P890, DOI 10.1016/j.dsp.2009.03.001    |
| 463 | 1 | 0 | 2019 | ARASH-ASiST, 2019, DA AR HAPT SYST EYE, V0, P0                                   |
| 464 | 1 | 0 | 2010 | Li ZY, 2010, AEU-INT J ELECTRON C, V64, P1137, DOI 10.1016/j.aeue.2009.11.011    |
| 465 | 1 | 0 | 1995 | SHARPLES M, 1995, P WORLD C ART INT ED, V0, P429                                 |
| 466 | 1 | 0 | 2016 | Khoury MJ, 2016, JAMA-J AM MED ASSOC, V316, P1357, DOI 10.1001/jama.2016.12260   |
| 467 | 1 | 0 | 1990 | PIEMME TE, 1990, SCAMC, V195, P509                                               |
| 468 | 1 | 0 | 2015 | Bosse HM, 2015, BMC MED EDUC, V15, P0, DOI 10.1186/s12909-015-0468-1             |
| 469 | 1 | 0 | 2015 | Alotaibi FE, 2015, NEUROSURGERY S2, V11, P98                                     |
| 470 | 1 | 0 | 2015 | Aschenbrener CA, 2015, ACAD MED, V90, P1203, DOI 10.1097/ACM.0000000000000829    |
| 471 | 1 | 0 | 1995 | BOUCHARD RM, 1995, P 1 INT COGN TECHN C, V0, P45                                 |
| 472 | 1 | 0 | 1996 | McGuire CH, 1996, ACAD MED, V71, PS121, DOI 10.1097/00001888-199610000-00063     |
| 473 | 1 | 0 | 1995 | PATEL VL, 1995, ARTIF INTELL MED, V7, P413, DOI 10.1016/0933-3657(95)00013-V     |
| 474 | 1 | 0 | 1993 | COLES C, 1993, LEARNING MED, V0, P45                                             |
| 475 | 1 | 0 | 2021 | Baglan E, 2021, MOD RHEUMATOL, V31, P481, DOI 10.1080/14397595.2020.1790139      |
| 476 | 1 | 0 | 1993 | Rasmussen J, 1993, DECISION MAKING ACTI, V0, P158                                |
| 477 | 1 | 0 | 1993 | LILLEHAUG SI, 1993, ST HEAL T, V10, P197                                         |
| 478 | 1 | 0 | 2017 | Becker AS, 2017, INVEST RADIOL, V52, P434, DOI 10.1097/RLI.0000000000000358      |
| 479 | 1 | 0 | 2014 | Alamodi AA, 2014, MED TEACH, V36, PS36, DOI 10.3109/0142159X.2014.886016         |
| 480 | 1 | 0 | 2018 | Adamson AS, 2018, JAMA DERMATOL, V154, P1247, DOI 10.1001/jamadermatol.2018.2348 |
| 481 | 1 | 0 | 2013 | Unknown -, 2013, OSTERREICHISCHE KOMP, V0, P0                                    |
| 482 | 1 | 0 | 1994 | Kivimaki M, 1994, J NURS MANAG, V2, P229, DOI 10.1111/j.1365-2834.1994.tb00161.x |
| 483 | 1 | 0 | 2007 | Bazi Y, 2007, PATTERN RECOGN, V40, P619, DOI 10.1016/j.patcog.2006.05.006        |
| 484 | 1 | 0 | 2013 | Thomas SJ, 2013, MED J AUSTRALIA, V198, P533, DOI 10.5694/mja12.11383            |
| 485 | 1 | 0 | 2014 | Blohm M, 2014, BMC MED EDUC, V14, P0, DOI 10.1186/1472-6920-14-71                |
| 486 | 1 | 0 | 1993 | Uckun S, 1993, ARTIF INTELL MED, V5, P89                                         |
| 487 | 1 | 0 | 2016 | Aïm F, 2016, ARTHROSCOPY, V32, P224, DOI 10.1016/j.arthro.2015.07.023            |
| 488 | 1 | 0 | 2020 | Abràmoff MD, 2020, AM J OPHTHALMOL, V214, P134, DOI 10.1016/j.ajo.2020.02.022    |
| 489 | 1 | 0 | 1994 | SITTIG DF, 1994, J AM MED INFORM ASSN, V1, P412, DOI 10.1136/jamia.1994.95153429 |
| 490 | 1 | 0 | 1995 | SHAW S, 1995, CAN J ED COMM, V24, P245                                           |
| 491 | 1 | 0 | 2004 | Naik B, 2004, COLL STUD J, V38, P143                                             |
| 492 | 1 | 0 | 2014 | Dieleman JL, 2014, PLOS ONE, V9, P0, DOI 10.1371/journal.pone.0110257            |

|     |   |      |      |                                                                                        |
|-----|---|------|------|----------------------------------------------------------------------------------------|
| 493 | 1 | 0    | 2016 | Gulshan V, 2016, JAMA-J AM MED ASSOC, V316, P2402, DOI 10.1001/jama.2016.17216         |
| 494 | 1 | 0    | 2008 | Scalese RJ, 2008, J GEN INTERN MED, V23, P46, DOI 10.1007/s11606-007-0283-4            |
| 495 | 1 | 0    | 2011 | Xue JH, 2011, IMAGE VISION COMPUT, V29, P631, DOI 10.1016/j.imavis.2011.06.003         |
| 496 | 1 | 0    | 2013 | Estruch R, 2013, NEW ENGL J MED, V368, P1279, DOI 10.1056/NEJMoal200303                |
| 497 | 1 | 0    | 1989 | STEVENS RH, 1989, 13TH P ANN S COMP AP, V0, P920                                       |
| 498 | 1 | 0    | 2015 | Monlezun DJ, 2015, DIABETES RES CLIN PR, V109, P420, DOI 10.1016/j.diabres.2015.05.007 |
| 499 | 1 | 0    | 1994 | GECSEI J, 1994, P ED MED C VANC, V0, P15                                               |
| 500 | 1 | 0    | 2013 | Ajala O, 2013, AM J CLIN NUTR, V97, P505, DOI 10.3945/ajcn.112.042457                  |
| 501 | 1 | 0    | 1996 | DEBOULAY B, 1996, EUR C AI ED LISB POR, V0, P0                                         |
| 502 | 1 | 0    | 1993 | STEFANELLI M, 1993, ARTIF INTELL MED, V5, P107, DOI 10.1016/0933-3657(93)90012-R       |
| 503 | 1 | 0    | 1994 | TEATHER BA, 1994, RIV NEURORADIOL, V7, P29                                             |
| 504 | 1 | 0    | 2017 | Bernard J, 2017, EXPERT SYST APPL, V75, P94, DOI 10.1016/j.eswa.2017.01.021            |
| 505 | 1 | 0.01 | 1995 | *UMUAI, 1995, INT J US MOD US AD I, V5, P0                                             |
| 506 | 1 | 0    | 1996 | Friedman CP, 1996, ACAD MED, V71, P0                                                   |
| 507 | 1 | 0    | 2016 | Burgess A, 2016, BMC MED EDUC, V16, P0, DOI 10.1186/s12909-016-0589-1                  |
| 508 | 1 | 0    | 2017 | Bruce AN, 2017, J SURG EDUC, V74, P589, DOI 10.1016/j.jsurg.2017.01.002                |
| 509 | 1 | 0    | 2017 | Lomis K, 2017, ACAD MED, V92, P765, DOI 10.1097/ACM.0000000000001543                   |
| 510 | 1 | 0    | 2016 | Arleo EK, 2016, J AM COLL RADIOL, V13, P188, DOI 10.1016/j.jacr.2015.08.005            |
| 511 | 1 | 0    | 2015 | Abubakar I, 2015, LANCET, V0, P0                                                       |
| 512 | 1 | 0    | 1993 | BASHOOK PG, 1993, LEARNING MED, V0, P21                                                |
| 513 | 1 | 0    | 2015 | Alotaibi FE, 2015, OPER NEUROSURG, V11, P89, DOI 10.1227/NEU.0000000000000631          |
| 514 | 1 | 0    | 1996 | Koschmann T, 1996, CSCL: THEORY AND PRACTICE OF AN EMERGING PARADIGM, V0, P83          |
| 515 | 1 | 0    | 2017 | Abujudeh H, 2017, AM J ROENTGENOL, V208, PW101, DOI 10.2214/AJR.16.16951               |
| 516 | 1 | 0    | 2006 | Lisboa PJ, 2006, NEURAL NETWORKS, V19, P408, DOI 10.1016/j.neunet.2005.10.007          |
| 517 | 1 | 0    | 1981 | BARR A, 1981, HDB ARTIFICIAL INTEL, V1, P189                                           |
| 518 | 1 | 0    | 2017 | Lessard L, 2017, IMPLEMENT SCI, V12, P0, DOI 10.1186/s13012-017-0607-7                 |
| 519 | 1 | 0    | 2014 | Gunasekara FI, 2014, INT J EPIDEMIOL, V43, P264, DOI 10.1093/ije/dyt221                |
| 520 | 1 | 0    | 2014 | Peters M, 2014, PERSPECT MED EDUC, V3, P76, DOI 10.1007/s40037-013-0083-y              |
| 521 | 1 | 0    | 2017 | Bughin J, 2017, ARTIFICIAL INTELLIGENCE: THE NEXT DIGITAL FRONTIER?, V0, P0            |
| 522 | 1 | 0    | 2011 | Moraes RM, 2011, VIRTUAL REALITY, V0, P325                                             |
| 523 | 1 | 0    | 2015 | Beck M, 2015, WALL ST J, V0, P0                                                        |
| 524 | 1 | 0    | 2018 | Canadian Association of Radiologists, 2018, AI RES, V0, P0                             |
| 525 | 1 | 0    | 2018 | Garcia- Arce A, 2018, J HEALTHC QUAL, V0, P1                                           |
